# Supplementary material for: Influence of tied-ridge-furrow with inorganic fertilizer on grain yield across semiarid regions of Asia and Africa: A meta-analysis
Source: PeerJ. 2021 Aug 17;9:e11904. doi: 10.7717/peerj.11904 (PMC8378338; doi:10.7717/peerj.11904)
Supplement: Supplemental Information 1 [file peerj-09-11904-s001.xlsx]

## Sheet: Sheet1
	Continent	Country	References	Crop	Tillage method
	Africa	Ethiopia	Berhanu et al., 2020	Pearl millet	FP	TR	TR+F
		Ethiopia	Aleminew et al., 2020	Pearl millet	FP	TR	TR+F
		Ethiopia	Sibhatu et al., 2017	Sorghum	FP	TR	TR+F
		Ethiopia	Zelelew et al., 2018	Sorghum	FP	TR
		Ethiopia	Brhane et al., 2006	Sorghum	FP	TR
		Ethiopia	Grum et al., 2017	Maize	FP	TR	TR+F	TR+M
		Ethiopia	Bekele & Gebremicheal, 2018	Maize	FP	TR
		Nigeria	Adeboye et al., 2017	Soybeans	FP	TR		TR+M
	Asia	China	Pan et al., 2019	Sunflower	FP	RF	RF+M
		China	Dong et al., 2017	Maize	FP	RF	RF+M
		China	Ren et al., 2017	Maize	FP		RF+M
		China	Xiukang et al., 2015	Maize	FP		RF+M
		China	Liu and Siddique, 2015	Maize	FP	RF	RF+M
		China	Song et al., 2013	Maize	FP	RF
		China	Wang et al., 2011	Maize	FP	RF	RF+M
		China	Wang et al., 2014	Maize	FP	RF	RF+M
	TR						NTR/Flat planting					TR+F					TR+M
Unit	Mean	SD	Total	References	Range	CV	Mean	SD	Total	Range	CV	Mean	SD	Total	Range	CV	Mean	SD	Total	Range	CV
kg ha− 1	2622	1118.64	2	Berhanu et al., 2020	1831-3413	42.6637	1988	1029.76	4	1061-3339	51.7988	3157.2	305.8	2	2851-3463	9.6858
kgha−1	2743.16	73.3146	5	Aleminew et al., 2020	2648-2839.8	2.67263	2954.4	805.431	10	1789.6-4086	27.2621	3896.12	1200.29	5	2537.6-5653	30.8073
kg ha-1				Grum et al., 2017			2805	355	2			2790	410	2			2610	350	2
kg ha-1	3394	1047.15	2	Sibhatu et al., 2017	2653.6-4134.5	30.8531	2901.35	831.202	4	2107.7-3870.4	28.6488	3846.16	979.785	2	3153.4-4539	25.4743
kg ha-1	1914.16	551.67	2	Adeboye et al., 2017	1680-2540	28.8205	1600	56.5685	2	1560-1640	3.53553						2155	63.6396	2	2110-2200	2.95311
kg ha− 1	2685	261.63	2	Brhane et al., 2006	2500-2870	9.74412	1135	487.904	2	790-1480	42.9871
kg/ha	8350	544.671	4	Bekele & Gebremicheal, 2018	7700-9000	6.52301	6150	525.991	4	5400-6600	8.5527
kg/ha	1414.99	776.033	3	Zelelew et al., 2018	860.3-2301.8	54.8438	750.51	900.553	3	0-1749.1	119.992
	Ridge-furrow						Flat planting										RF+M
	Mean	SD	Total	Study	Range	CV	Mean	SD	Total	Range	CV	Mean	SD	Total	Range	CV	Mean	SD	Total	Range	CV
kg ha−1	11247.3	3122.15	4	Dong et al., 2017	6581-13140	27.7592	9758.75	3191.02	4	5014-11660	32.699						12277.5	2868.78	4	8026-14021	23.3662
kg ha−1	1079.67	1011.37	3	Pan et al., 2019	0-2005	93.6743	1036.33	1123.9	3	0-2231	108.449						1456.67	1379.01	3	0-2742	94.6686
kg ha−1				Ren et al., 2017			8246	731.111	4	7255-8844	8.86625						9480.5	1104.31	4	8217-10601	11.6482
kg ha−1				Xiukang et al., 2015			3711.4	84.3	3	3627.1-3795.7	2.27138						3364.9	38.8879	3	3330.7-3407.2	1.15569
kg ha−1	6850.5	9102.59	2	Liu and Siddique, 2015	414-13287	132.875	6747	9007.13	2	378-13116	133.498						8564	6841.97	2	3726-13402	79.8922
kg ha−1	10670	1886.63	3	Song et al., 2013	8503.3-11949.6	17.6817	10419.8	1644.98	3	8543.6-11614.7	15.7871
kg ha−1	5933.25	1403.25	2	Wang et al., 2011	4941-6925.5	23.6507	5503.2	987.404	2	4805-6201.4	17.9424						6863.8	1020.78	2	6142-7585.6	14.8719
kg ha−1				Wang et al., 2014			6600	379.868	3	6190-6940	5.75558						7043.33	1580.52	3	5440-8600	22.4399
